# Supplementary material for: Mindfulness-Based Interventions During Pregnancy: a Systematic Review and Meta-analysis
Source: Springer Nature journal article supplement (doi:10.1007/s12671-017-0726-x), 2017-04-17
Supplement: MOESM1 [file 12224610]

# Supplementary Material 1

Database: Ovid MEDLINE(R) In-Process & Other Non-Indexed Citations and Ovid MEDLINE(R)

<1946 to Present> 20FEB2017

Search Strategy:

- 
- 1 exp Pregnancy/ or pregnancy.mp.
  - 2 Midwifery.mp. or exp Midwifery/
  - 3 Maternal Health.mp. or exp Maternal Health/
  - 4 Perinatal Care.mp. or exp Perinatal Care/
  - 5 Parenting.mp. or exp Parenting/
  - 6 Parturition.mp. or exp Parturition/
  - 7 Childbirth.mp.
  - 8 Prenatal Education.mp. or exp Prenatal Education/ or exp Prenatal Care/
  - 9 Patient Satisfaction.mp. or exp Patient Satisfaction/
  - 10 obstetric delivery.mp. or exp Delivery, Obstetric/
  - 11 1 or 2 or 3 or 4 or 5 or 6 or 7 or 8 or 9 or 10
  - 12 Labor Pain.mp. or exp Labor Pain/
  - 13 Psychological adaptation.mp. or exp Adaptation, Psychological/
  - 14 Psychological stress.mp. or exp Stress, Psychological/
  - 15 perinatal distress.mp.
  - 16 postpartum depression.mp. or exp Depression, Postpartum/
  - 17 separation anxiety.mp. or exp Anxiety, Separation/
  - 18 12 or 13 or 14 or 15 or 16 or 17
  - 19 11 and 18
  - 20 Mindfulness.mp. or exp Mindfulness/
  - 21 Meditation.mp. or exp Meditation/
  - 22 Yoga.mp. or exp Yoga/
  - 23 20 or 21 or 22
  - 24 19 and 23

\*\*\*\*\*
