# Supplementary material for: Mindfulness-Based Interventions During Pregnancy: a Systematic Review and Meta-analysis
Source: Springer Nature journal article supplement (doi:10.1007/s12671-017-0726-x), 2017-04-17
Supplement: MOESM2 [file 12224610]

## Supplementary Material 2

|                                     | Selection Bias |    | Study Design |     |     |     | Confounders |    | Blinding |    | Data Collection methods |    | Withdrawals and Dropouts |    | Global Rating |
|-------------------------------------|----------------|----|--------------|-----|-----|-----|-------------|----|----------|----|-------------------------|----|--------------------------|----|---------------|
|                                     | Q1             | Q2 | Q1           | Q2  | Q3  | Q4  | Q1          | Q2 | Q1       | Q2 | Q1                      | Q2 | Q1                       | Q2 |               |
| <b>Beddoe et al (2009)</b>          | 3              | 3  | 5            | No  | n/a | n/a | 2           | 4  | 3        | 3  | 1                       | 1  | 1                        | 1  | Weak          |
|                                     | Weak           |    | Moderate     |     |     |     | Weak        |    | Moderate |    | Strong                  |    | Strong                   |    |               |
| <b>Bowen et al (2014)</b>           | 3              | 5  | 3            | No  | n/a | n/a | 2           | 4  | 3        | 3  | 1                       | 1  | 3                        | 4  | Weak          |
|                                     | Weak           |    | Moderate     |     |     |     | Weak        |    | Moderate |    | Strong                  |    | Weak                     |    |               |
| <b>Byrne et al (2014)</b>           | 3              | 5  | 5            | No  | n/a | n/a | 3           | 4  | 3        | 3  | 1                       | 1  | 1                        | 1  | Weak          |
|                                     | Weak           |    | Moderate     |     |     |     | Weak        |    | Moderate |    | Strong                  |    | Strong                   |    |               |
| <b>Dimidijan et al (2015)</b>       | 3              | 2  | 5            | No  | n/a | n/a | 3           | 4  | 3        | 3  | 1                       | 1  | 1                        | 1  | Weak          |
|                                     | Weak           |    | Moderate     |     |     |     | Weak        |    | Moderate |    | Strong                  |    | Strong                   |    |               |
| <b>Dimidijan et al (2016)</b>       | 3              | 1  | 1            | Yes | No  | n/a | 1           | 1  | 3        | 3  | 1                       | 1  | 1                        | 2  | Moderate      |
|                                     | Weak           |    | Strong       |     |     |     | Strong      |    | Moderate |    | Strong                  |    | Moderate                 |    |               |
| <b>Duncan &amp; Bardack (2009)</b>  | 3              | 5  | 5            | No  | n/a | n/a | 3           | 4  | 3        | 3  | 1                       | 1  | 3                        | 4  | Weak          |
|                                     | Weak           |    | Moderate     |     |     |     | Weak        |    | Moderate |    | Strong                  |    | Weak                     |    |               |
| <b>Dunn et al (2012)</b>            | 3              | 5  | 3            | No  | n/a | n/a | 3           | 4  | 3        | 3  | 1                       | 1  | 3                        | 4  | Weak          |
|                                     | Weak           |    | Moderate     |     |     |     | Weak        |    | Moderate |    | Strong                  |    | Weak                     |    |               |
| <b>Goodman et al (2014)</b>         | 3              | 5  | 5            | No  | n/a | n/a | 3           | 4  | 3        | 3  | 1                       | 1  | 1                        | 1  | Weak          |
|                                     | Weak           |    | Moderate     |     |     |     | Weak        |    | Moderate |    | Strong                  |    | Strong                   |    |               |
| <b>Guardino et al (2014)</b>        | 3              | 1  | 1            | Yes | Yes | Yes | 2           | 4  | 3        | 3  | 1                       | 1  | 1                        | 1  | Weak          |
|                                     | Weak           |    | Strong       |     |     |     | Weak        |    | Moderate |    | Strong                  |    | Strong                   |    |               |
| <b>Matvienko-Sikar et al (2016)</b> | 3              | 3  | 1            | Yes | No  | n/a | 2           | 4  | 3        | 3  | 1                       | 1  | 1                        | 2  | Weak          |
|                                     | Weak           |    | Strong       |     |     |     | Weak        |    | Moderate |    | Strong                  |    | Moderate                 |    |               |
| <b>Muthukrishnan et al (2016)</b>   | 3              | 5  | 1            | Yes | No  | n/a | 2           | 4  | 3        | 3  | 1                       | 1  | 3                        | 4  | Weak          |
|                                     | Weak           |    | Strong       |     |     |     | Weak        |    | Moderate |    | Strong                  |    | Weak                     |    |               |
| <b>Shahataheri et al (2016)</b>     | 3              | 5  | 1            | Yes | No  | n/a | 3           | 4  | 3        | 3  | 1                       | 1  | 3                        | 4  | Weak          |
|                                     | Weak           |    | Strong       |     |     |     | Weak        |    | Moderate |    | Strong                  |    | Weak                     |    |               |
| <b>Vieten &amp; Astin (2008)</b>    | 3              | 2  | 1            | Yes | No  | n/a | 3           | 4  | 3        | 3  | 1                       | 1  | 1                        | 1  | Weak          |
|                                     | Weak           |    | Strong       |     |     |     | Weak        |    | Moderate |    | Strong                  |    | Strong                   |    |               |
| <b>Woolhouse et al (2014)</b>       |                |    |              |     |     |     |             |    |          |    |                         |    |                          |    |               |
| One-group cohort study              | 3              | 4  | 5            | No  | n/a | n/a | 3           | 4  | 3        | 3  | 1                       | 1  | 1                        | 3  | Weak          |
|                                     | Weak           |    | Moderate     |     |     |     | Weak        |    | Moderate |    | Strong                  |    | Weak                     |    |               |
| RCT (pilot)                         | 3              | 4  | 1            | Yes | No  | No  | 3           | 4  | 3        | 3  | 1                       | 1  | 1                        | 2  | Weak          |
|                                     | Weak           |    | Strong       |     |     |     | Weak        |    | Moderate |    | Strong                  |    | Moderate                 |    |               |

Quality Assessment for Quantitative Studies (Effective Public Health Practice Project, 2007)
